# Supplementary material for: Guideline-directed medical therapy in elderly patients with heart failure with reduced ejection fraction: a cohort study
Source: PubMed Central journal article supplement — BMJ Open. 2020 Feb 6;10(2):e030514. doi: 10.1136/bmjopen-2019-030514 (PMC7044987; doi:10.1136/bmjopen-2019-030514), 2020-02-06
Supplement: bmjopen-2019-030514supp001.pdf [file bmjopen-2019-030514supp001.pdf]

**Supplementary table 1.** Baseline characteristics of patients according to continue or discontinued of beta-blocker during index admission

| Variable                                     | Continue beta-blocker (n=433) | Discontinue beta-blocker (n=161) | P value |
|----------------------------------------------|-------------------------------|----------------------------------|---------|
| Age, years                                   | 75.3 ± 6.6                    | 76.4 ± 6.9                       | 0.08    |
| Men, n (%)                                   | 233 (53.8)                    | 92 (57.1)                        | 0.516   |
| BMI, kg/m <sup>2</sup>                       | 23.5 ± 3.6                    | 22.4 ± 3.2                       | <0.001  |
| Medical history                              |                               |                                  |         |
| Previous heart failure, n (%)                | 332 (76.7)                    | 116 (72.0)                       | 0.284   |
| Hypertension, n (%)                          | 336 (77.6)                    | 117 (72.7)                       | 0.233   |
| Diabetes, n (%)                              | 213 (49.2)                    | 64 (39.8)                        | 0.042   |
| Atrial fibrillation, n (%)                   | 151 (34.9)                    | 46 (28.6)                        | 0.170   |
| COPD, n (%)                                  | 48 (11.1)                     | 21 (13.0)                        | 0.564   |
| Myocardial infarction, n (%)                 | 165 (38.1)                    | 56 (34.8)                        | 0.504   |
| Medication on discharge                      |                               |                                  |         |
| RAS inhibitor, n (%)                         | 316 (73.0)                    | 107 (66.5)                       | 0.127   |
| MRA, n (%)                                   | 213 (49.2)                    | 74 (46.0)                        | 0.518   |
| Loop diuretics, n (%)                        | 71 (16.4)                     | 49 (30.4)                        | <0.001  |
| Digoxin, n (%)                               | 300 (69.3)                    | 116 (72.0)                       | 0.546   |
| Systolic BP on admission, mm Hg              | 135.5 ± 28.7                  | 131.3 ± 29.0                     | 0.116   |
| Diastolic BP on admission, mm Hg             | 81.1 ± 18.0                   | 76.8 ± 18.1                      | 0.010   |
| Heart rate on admission, beats/min           | 89.7 ± 23.8                   | 92.9 ± 27.6                      | 0.172   |
| NYHA functional class III or IV on admission | 380 (87.8)                    | 153 (95.0)                       | 0.009   |

## Laboratory data on admission

|                                 |                   |                   |       |
|---------------------------------|-------------------|-------------------|-------|
| eGFR, ml/min/1.73m <sup>2</sup> | 51.2 ± 25.1       | 46.7 ± 23.4       | 0.051 |
| Sodium, mEq/L                   | 137.7 ± 4.2       | 137.4 ± 5.0       | 0.454 |
| Potassium, mEq/L                | 4.5 ± 0.7         | 4.5 ± 0.7         | 0.242 |
| BNP, pg/mL                      | 1593.1 ± 1306.1   | 1926.5 ± 1515.7   | 0.150 |
| NT-pro-BNP, pg/mL               | 11545.9 ± 10872.8 | 14650.1 ± 12629.1 | 0.036 |
| LVEF, %                         | 29.1 ± 6.9        | 28.6 ± 7.8        | 0.483 |

---

BMI, body mass index; COPD, chronic obstructive pulmonary disease; RAS, renin angiotensin system; MRA, mineralocorticoid receptor antagonist; BP, blood pressure; GFR, glomerular filtration rate; BNP, brain natriuretic peptide; LVEF, left ventricular ejection fraction
