# Supplementary material for: Guideline-directed medical therapy in elderly patients with heart failure with reduced ejection fraction: a cohort study
Source: PubMed Central journal article supplement — BMJ Open. 2020 Feb 6;10(2):e030514. doi: 10.1136/bmjopen-2019-030514 (PMC7044987; doi:10.1136/bmjopen-2019-030514), 2020-02-06
Supplement: bmjopen-2019-030514supp002.pdf [file bmjopen-2019-030514supp002.pdf]

(A) Cumulative survival according to beta-blocker prescription pattern

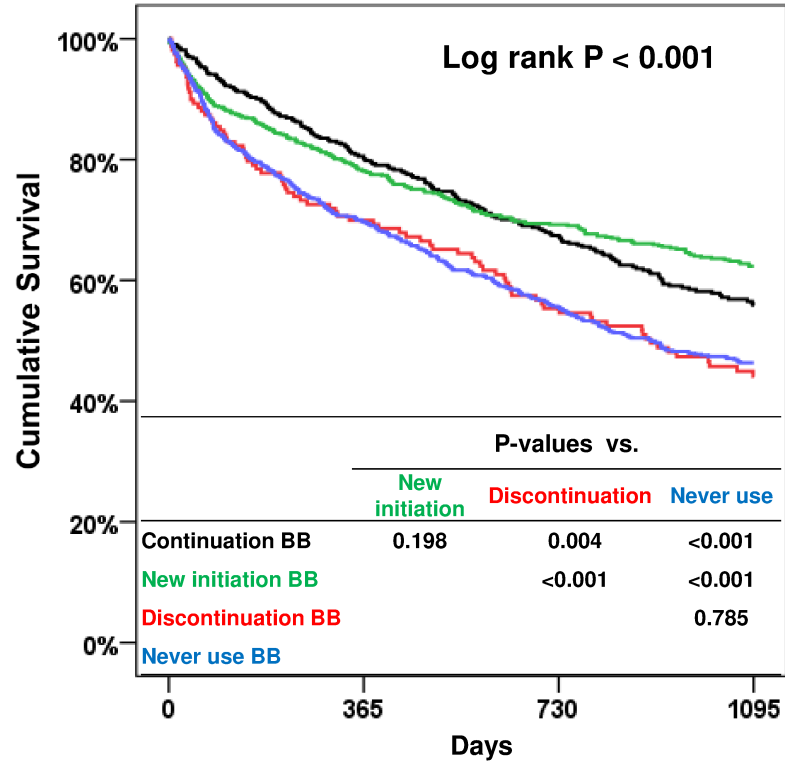

| No at risk         | Days |     |     |      |
|--------------------|------|-----|-----|------|
|                    | 0    | 365 | 730 | 1095 |
| Continuation BB    | 433  | 323 | 251 | 161  |
| New initiation BB  | 687  | 483 | 402 | 289  |
| Discontinuation BB | 161  | 102 | 77  | 51   |
| Never use BB       | 764  | 494 | 373 | 246  |

(B) Cumulative survival according to RAS inhibitor prescription pattern

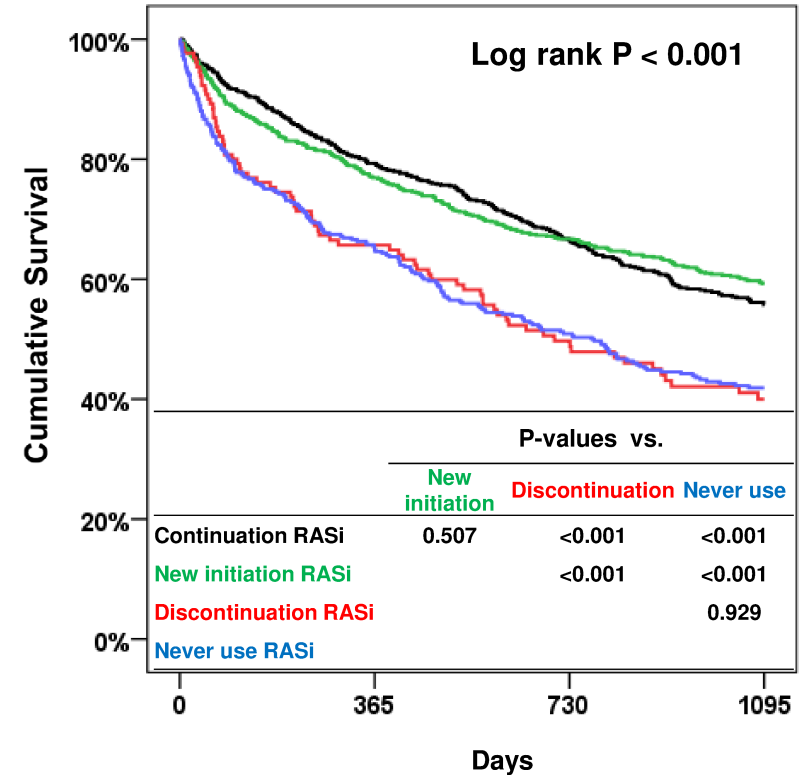

| No at risk           | Days |     |     |      |
|----------------------|------|-----|-----|------|
|                      | 0    | 365 | 730 | 1095 |
| Continuation RASi    | 715  | 528 | 418 | 278  |
| New initiation RASi  | 819  | 565 | 461 | 319  |
| Discontinuation RASi | 131  | 80  | 55  | 36   |
| Never use RASi       | 380  | 230 | 169 | 114  |
