# Supplementary material for: Guideline-directed medical therapy in elderly patients with heart failure with reduced ejection fraction: a cohort study
Source: PubMed Central journal article supplement — BMJ Open. 2020 Feb 6;10(2):e030514. doi: 10.1136/bmjopen-2019-030514 (PMC7044987; doi:10.1136/bmjopen-2019-030514), 2020-02-06
Supplement: bmjopen-2019-030514supp003.pdf [file bmjopen-2019-030514supp003.pdf]

**Supplementary table 2.** Baseline characteristics of patients according to continue or discontinued of RAS inhibitor during index admission

| Variable                                     | Continue RAS inhibitor | Discontinue RAS inhibitor | P value |
|----------------------------------------------|------------------------|---------------------------|---------|
| Age, years                                   | 75.8 ± 6.7             | 76.3 ± 6.5                | 0.481   |
| Men, n (%)                                   | 400 (55.9)             | 70 (53.4)                 | 0.633   |
| BMI, kg/m <sup>2</sup>                       | 23.1 ± 3.5             | 22.9 ± 3.3                | 0.562   |
| Medical history                              |                        |                           |         |
| Previous heart failure, n (%)                | 512 (71.6)             | 92 (70.2)                 | 0.753   |
| Hypertension, n (%)                          | 543 (75.9)             | 102 (77.9)                | 0.738   |
| Diabetes, n (%)                              | 343 (48.0)             | 70 (53.4)                 | 0.256   |
| Atrial fibrillation, n (%)                   | 235 (32.9)             | 34 (26.0)                 | 0.127   |
| COPD, n (%)                                  | 95 (13.3)              | 19 (14.5)                 | 0.678   |
| Myocardial infarction, n (%)                 | 220 (30.8)             | 52 (39.7)                 | 0.053   |
| Medication on discharge                      |                        |                           |         |
| Beta-blocker, n (%)                          | 380 (53.1)             | 58 (44.3)                 | 0.071   |
| MRA, n (%)                                   | 348 (48.7)             | 49 (37.4)                 | 0.022   |
| Loop diuretics, n (%)                        | 159 (22.2)             | 44 (33.6)                 | 0.007   |
| Digoxin, n (%)                               | 483 (67.6)             | 99 (75.6)                 | 0.081   |
| Systolic BP on admission, mm Hg              | 134.7 ± 28.6           | 127.1 ± 31.3              | 0.006   |
| Diastolic BP on admission, mm Hg             | 79.8 ± 16.8            | 73.1 ± 17.3               | <0.001  |
| Heart rate on admission, beats/min           | 91.4 ± 24.6            | 96.9 ± 22.5               | 0.018   |
| NYHA functional class III or IV on admission | 623 (87.1%)            | 117 (89.3)                | 0.567   |

## Laboratory data on admission

|                                 |                   |                   |        |
|---------------------------------|-------------------|-------------------|--------|
| eGFR, ml/min/1.73m <sup>2</sup> | 53.3 ± 23.6       | 39.5 ± 20.8       | <0.001 |
| Sodium, mEq/L                   | 137.6 ± 4.9       | 136.8 ± 4.5       | 0.062  |
| Potassium, mEq/L                | 4.4 ± 0.7         | 4.7 ± 0.8         | 0.001  |
| BNP, pg/mL                      | 1670.8 ± 1502.2   | 1920.8 ± 2017.2   | 0.355  |
| NT-pro-BNP, pg/mL               | 10966.0 ± 10806.0 | 14939.1 ± 12170.9 | 0.007  |
| LVEF, %                         | 28.6 ± 7.5        | 28.6 ± 7.4        | 0.929  |

---

BMI, body mass index; COPD, chronic obstructive pulmonary disease; RAS, renin angiotensin system; MRA, mineralocorticoid receptor antagonist; BP, blood pressure; GFR, glomerular filtration rate; BNP, brain natriuretic peptide; LVEF, left ventricular ejection fraction
