# Supplementary material for: Guideline-directed medical therapy in elderly patients with heart failure with reduced ejection fraction: a cohort study
Source: PubMed Central journal article supplement — BMJ Open. 2020 Feb 6;10(2):e030514. doi: 10.1136/bmjopen-2019-030514 (PMC7044987; doi:10.1136/bmjopen-2019-030514), 2020-02-06
Supplement: bmjopen-2019-030514supp004.pdf [file bmjopen-2019-030514supp004.pdf]

**Online supplementary table 3.** Patients characteristics in inverse probability treatment weight adjusted population

|                               | <b>GDMT<br/>(n=1813)</b> | <b>Beta blocker<br/>only<br/>(n=1298)</b> | <b>RAS inhibitor<br/>only<br/>(n=1709)</b> | <b>No GDMT<br/>(n=1132)</b> | <b>Std.<br/>Diff.</b> | <b>P value</b> |
|-------------------------------|--------------------------|-------------------------------------------|--------------------------------------------|-----------------------------|-----------------------|----------------|
| Age, years                    | 75.5 ± 6.7               | 75.6 ± 6.8                                | 76.1 ± 7.0                                 | 76.7 ± 6.8                  | 0.17                  | 0.07           |
| Men, n (%)                    | 964 (53.2)               | 757 (58.3)                                | 963 (56.3)                                 | 622 (54.9)                  | 0.10                  | 0.26           |
| BMI, kg/m <sup>2</sup>        | 22.7 ± 3.4               | 22.6 ± 3.5                                | 22.4 ± 3.3                                 | 22.4 ± 3.2                  | 0.08                  | 0.34           |
| Medical history               |                          |                                           |                                            |                             |                       |                |
| Previous heart failure, n (%) | 905 (49.9)               | 687 (52.9)                                | 901 (52.8)                                 | 656 (58.0)                  | 0.16                  | 0.05           |
| Hypertension, n (%)           | 1233 (68.0)              | 870 (67.0)                                | 1108 (64.9)                                | 732 (64.6)                  | 0.07                  | 0.24           |
| Diabetes, n (%)               | 774 (42.7)               | 481 (37.0)                                | 650 (38.0)                                 | 472 (41.7)                  | 0.11                  | 0.09           |
| Chronic kidney disease, n (%) | 933 (51.5)               | 769 (59.2)                                | 877 (51.3)                                 | 674 (59.6)                  | 0.16                  | 0.05           |
| Atrial fibrillation, n (%)    | 566 (31.2)               | 448 (34.5)                                | 515 (30.2)                                 | 380 (33.6)                  | 0.09                  | 0.32           |
| COPD, n (%)                   | 211 (11.6)               | 168 (12.9)                                | 247 (14.5)                                 | 162 (14.3)                  | 0.08                  | 0.12           |
| Myocardial infarction, n (%)  | 395 (21.8)               | 330 (25.4)                                | 384 (22.5)                                 | 292 (25.8)                  | 0.10                  | 0.34           |
| Cause of heart failure        |                          |                                           |                                            |                             |                       |                |
| Ischemic, n (%)               | 920 (50.8)               | 752 (57.9)                                | 837 (49.0)                                 | 615 (54.4)                  | 0.18                  | 0.06           |
| Dilated, n (%)                | 434 (23.9)               | 250 (19.2)                                | 387 (22.6)                                 | 213 (18.8)                  | 0.12                  | 0.15           |
| Medication on admission       |                          |                                           |                                            |                             |                       |                |
| Beta-blocker, n (%)           | 561 (31.0)               | 442 (34.0)                                | 439 (25.7)                                 | 259 (22.9)                  | 0.24                  | 0.03           |
| RAS inhibitor, n (%)          | 727 (40.1)               | 459 (35.4)                                | 762 (44.6)                                 | 409 (36.2)                  | 0.19                  | 0.06           |
| MRA, n (%)                    | 301 (16.6)               | 277 (21.3)                                | 296 (17.3)                                 | 224 (19.8)                  | 0.12                  | 0.15           |
| Medication on discharge       |                          |                                           |                                            |                             |                       |                |
| MRA, n (%)                    | 936 (51.6)               | 643 (49.6)                                | 839 (49.1)                                 | 486 (42.9)                  | 0.17                  | 0.03           |

|                                    |                   |                   |                   |                   |      |      |
|------------------------------------|-------------------|-------------------|-------------------|-------------------|------|------|
| Loop diuretics, n (%)              | 1427 (78.7)       | 977 (75.2)        | 1305 (76.4)       | 794 (70.2)        | 0.21 | 0.01 |
| Digoxin, n (%)                     | 547 (30.2)        | 358 (27.6)        | 488 (28.5)        | 361 (31.9)        | 0.09 | 0.39 |
| Systolic BP on discharge, mm Hg    | 114.7 ± 16.8      | 113.8 ± 16.8      | 115.0 ± 16.5      | 112.5 ± 15.4      | 0.15 | 0.39 |
| Diastolic BP on discharge, mm Hg   | 66.1 ± 10.8       | 66.1 ± 10.1       | 66.1 ± 10.9       | 65.0 ± 9.9        | 0.10 | 0.20 |
| Heart rate on discharge, beats/min | 76.3 ± 13.6       | 77.8 ± 12.3       | 77.2 ± 14.2       | 77.4 ± 13.5       | 0.10 | 0.21 |
| NYHA functional class on discharge |                   |                   |                   |                   | 0.10 | 0.23 |
| I or II, n (%)                     | 1598 (88.1)       | 1148 (88.4)       | 1496 (87.5)       | 1028 (90.8)       |      |      |
| III or IV, n (%)                   | 215 (11.9)        | 150 (11.6)        | 213 (12.5)        | 105 (9.2)         |      |      |
| Echocardiographic parameters       |                   |                   |                   |                   |      |      |
| LVEDD, mm                          | 60.2 ± 8.8        | 59.6 ± 8.7        | 60.3 ± 8.7        | 59.3 ± 8.7        | 0.11 | 0.40 |
| LVESD, mm                          | 50.3 ± 9.3        | 49.9 ± 9.3        | 50.0 ± 9.5        | 49.4 ± 9.5        | 0.09 | 0.26 |
| LVEF, %                            | 28.7 ± 7.3        | 28.2 ± 7.7        | 28.9 ± 7.3        | 29.0 ± 7.2        | 0.11 | 0.57 |
| Laboratory data on admission       |                   |                   |                   |                   |      |      |
| Hemoglobin, g/dL                   | 12.3 ± 2.0        | 12.3 ± 1.9        | 12.3 ± 2.1        | 12.1 ± 2.1        | 0.08 | 0.49 |
| eGFR, ml/min/1.73m <sup>2</sup>    | 61.6 ± 32.6       | 58.6 ± 30.1       | 62.3 ± 30.1       | 56.5 ± 28.1       | 0.18 | 0.07 |
| Sodium, mEq/L                      | 137.8 ± 4.5       | 138.0 ± 4.2       | 137.6 ± 4.5       | 137.4 ± 4.5       | 0.11 | 0.78 |
| Potassium, mEq/L                   | 4.4 ± 0.7         | 4.4 ± 0.7         | 4.4 ± 0.7         | 4.5 ± 0.7         | 0.14 | 0.46 |
| BNP, pg/mL                         | 1692.2 ± 1528.3   | 1703.7 ± 1403.4   | 1731.0 ± 1389.8   | 1732.8 ± 1858.4   | 0.03 | 0.81 |
| NT-pro-BNP, pg/mL                  | 11650.7 ± 11236.4 | 10810.0 ± 10121.4 | 10549.1 ± 10321.2 | 12307.0 ± 10979.5 | 0.16 | 0.10 |

GDMT, guideline-directed medical therapy; RAS, renin angiotensin system; BMI, body mass index; COPD, chronic obstructive pulmonary disease; MRA, mineralocorticoid receptor antagonist; BP, blood pressure; LVEDD, left ventricular end diastolic diameter; LVESD, left ventricular end systolic diameter; LVEF, left ventricular ejection fraction; GFR, glomerular filtration rate; BNP, brain natriuretic peptide
