# Supplementary material for: Guideline-directed medical therapy in elderly patients with heart failure with reduced ejection fraction: a cohort study
Source: PubMed Central journal article supplement — BMJ Open. 2020 Feb 6;10(2):e030514. doi: 10.1136/bmjopen-2019-030514 (PMC7044987; doi:10.1136/bmjopen-2019-030514), 2020-02-06
Supplement: bmjopen-2019-030514supp005.pdf [file bmjopen-2019-030514supp005.pdf]

(A) All patients

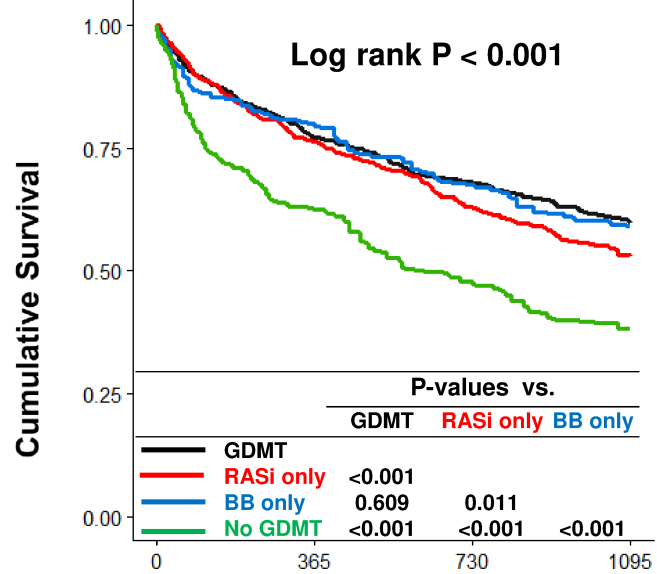

| No at risk | Days |      |      |      |
|------------|------|------|------|------|
|            | 0    | 365  | 730  | 1095 |
| GDMT       | 1813 | 1279 | 1064 | 729  |
| RASi only  | 1709 | 1193 | 926  | 633  |
| BB only    | 1298 | 936  | 736  | 541  |
| No GDMT    | 1132 | 654  | 489  | 308  |

(B) Age 65-79 years

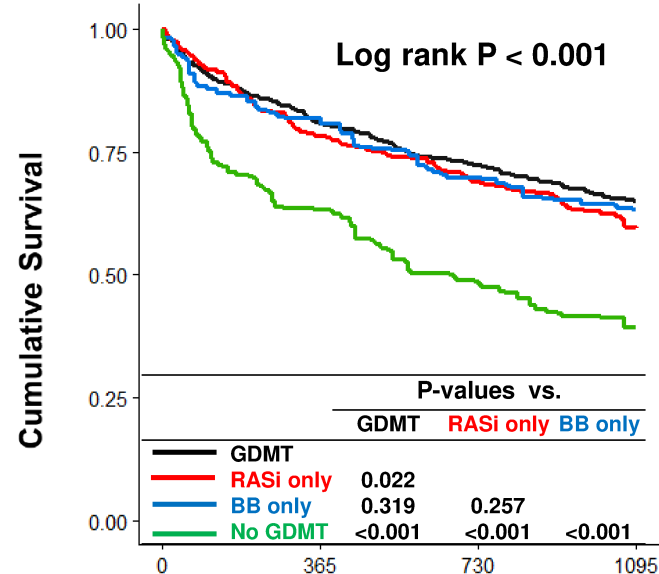

| No at risk | Days |     |     |      |
|------------|------|-----|-----|------|
|            | 0    | 365 | 730 | 1095 |
| GDMT       | 1326 | 986 | 836 | 586  |
| RASi only  | 1169 | 836 | 689 | 500  |
| BB only    | 956  | 722 | 583 | 459  |
| No GDMT    | 726  | 423 | 315 | 197  |

(C) Age ≥ 80 years

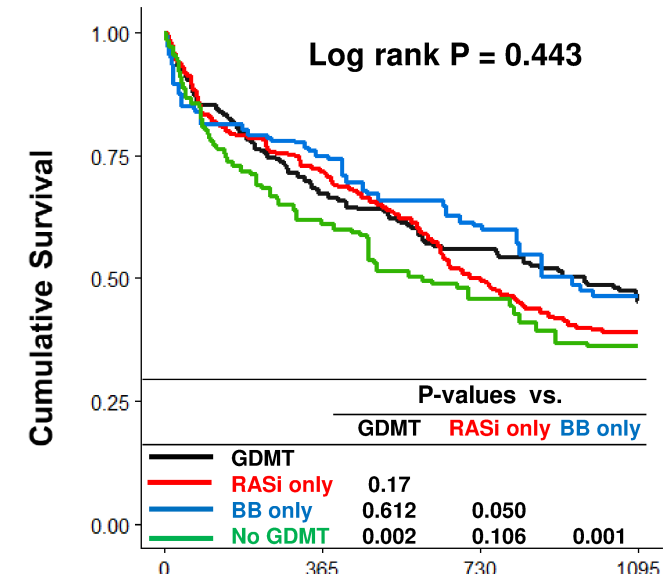

| No at risk | Days |     |     |      |
|------------|------|-----|-----|------|
|            | 0    | 365 | 730 | 1095 |
| GDMT       | 487  | 293 | 228 | 143  |
| RASi only  | 539  | 357 | 237 | 133  |
| BB only    | 342  | 214 | 154 | 82   |
| No GDMT    | 407  | 231 | 173 | 111  |
